# Supplementary material
Source: PubMed Central journal article supplement (PMC5035541)
Supplement: NIHMS69825-supplement-Supplementary_Table_1.pdf [file NIHMS69825-supplement-Supplementary_Table_1.pdf]

**Table 1.** List of antibodies

|    | <b>Primary Antibodies</b>              | <b>Clone/ Cat. No.</b> | <b>Company</b>       | <b>Application</b> |
|----|----------------------------------------|------------------------|----------------------|--------------------|
| 1  | GFP, Alexa 488                         | A21311                 | Invitrogen           | IHC                |
| 2  | PDGFR beta                             | AF1042                 | R&D                  | IHC                |
| 3  | Endomucin                              | V.7C7/ sc-65495        | Santa Cruz           | IHC, FACS          |
| 4  | Pecam1 conjugated to Alexa Fluor 488   | FAB3628G               | R&D                  | IHC, FACS          |
| 5  | Pecam1 conjugated to APC               | FAB3628A               | R&D                  | FACS               |
| 6  | Pecam1                                 | MEC 13.3 / 553370      | BD Pharmingen        | FACS               |
| 7  | $\alpha$ -smooth muscle actin-Cy3      | 1A4 / C6198            | Sigma                | IHC                |
| 8  | Hif1- $\alpha$                         | ab65979                | Abcam                | IHC                |
| 9  | CD31-APC                               | FAB3628A               | R&D                  | FACS               |
| 10 | CD45 Biotin                            | 553077                 | Becton Dickinson     | FACS               |
| 11 | Ter119                                 | 553672                 | BD Pharmingen        | FACS               |
| 12 | CD31-Alexa Fluor 488                   | FAB3628G               | R&D                  | FACS               |
| 13 | CD150 Biotin                           | LS-C106771             | Lifespan Biosciences | IHC                |
| 14 | CD48                                   | NBP1-76556             | Novus Biologicals    | IHC                |
| 15 | Lineage Cocktail mouse AlexaFluor700   | 133313                 | BioLegend            | IHC                |
| 16 | CD150 (SLAM) Alexa-488                 | MCA2274A488            | AbD Serotec          | FACS               |
| 17 | CD3e-APC                               | 17-0031                | eBioscience          | FACS               |
| 18 | CD11b-APC                              | 101211                 | BioLegend            | FACS               |
| 19 | TER-119 APC                            | 17-5921-81             | eBioscience          | FACS               |
| 20 | CD45.1/Ly-5.1 FITC                     | MCD45101               | Invitrogen           | FACS               |
| 21 | CD48-Cy7                               | 561242                 | BD Pharmingen        | FACS               |
| 22 | Ephrin B2                              | sc-1010                | SantaCruz            | FACS               |
| 23 | CD140b APC                             | 17-1402-82             | eBiosciences         | FACS               |
| 24 | SCF (H-189)                            | sc-9132                | Santa Cruz           | IHC                |
| 25 | CD117-APC (c-Kit)                      | 553356                 | BD Pharmingen        | FACS               |
| 26 | Ly-6A/E PE-Cy7                         | 558162                 | BD Pharmingen        | FACS               |
| 27 | CD5 Biotin                             | 13-0051                | eBioscience          | FACS               |
| 28 | CD2 Biotin                             | 13-0021                | eBioscience          | FACS               |
| 29 | CD4 Biotin                             | 13-0042                | eBioscience          | FACS               |
| 30 | CD8a Biotin                            | 13-0081                | eBioscience          | FACS               |
| 31 | CD45R (B220)-APC                       | RM2605                 | Invitrogen           | IHC                |
| 32 | CD45 Biotin                            | 553077                 | Becton Dickinson     | FACS               |
| 33 | Sox17                                  | PA5-23352              | ThermoScientific     | IHC                |
| 34 | Mouse lineage panel biotin             | 559971                 | BD Pharmingen        | FACS               |
| 35 | Phospho Histone H2A.X                  | 05-636                 | Millipore            | IHC                |
| 36 | PDGF receptor alpha                    | Clone D1E1E, #3174     | Cell Signaling       | FACS               |
| 37 | Osterix                                | sc-22536-R             | Santa Cruz           | IHC                |
| 38 | Ly-6A/E (Sca1)                         | Clone E13-161.7,122502 | BioLegend            | FACS               |
| 39 | Lineage Cell Detection Cocktail-Biotin | 130-092-613            | Miltenyi Biotec      | FACS               |
| 40 | CD45.2 Pacific Blue                    | 109820                 | BioLegend            | FACS               |
| 41 | CD45 Biotin                            | 553077                 | Becton Dickinson     | FACS               |
| 42 | phospho-p44/42 MAPK                    | 4370                   | Cell Signaling       | IHC                |

|    | <b>Secondary Antibodies</b>       |             |                                   |      |
|----|-----------------------------------|-------------|-----------------------------------|------|
| 43 | Streptavidin PE-Cy5               | 554062      | BD Pharmingen                     | IHC  |
| 44 | Anti Rabbit APC                   | 711-136-152 | Jackson Laboratories              | FACS |
| 45 | anti rat Alexa Fluor 594          | A21209      | Invitrogen/ Life Technologies     | IHC  |
| 46 | anti rabbit Alexa Fluor 546       | A10040      | Invitrogen/ Life Technologies     | IHC  |
| 47 | anti rabbit Alexa Fluor 546       | A11035      | Invitrogen/ Life Technologies     | IHC  |
| 48 | Streptavidin Brilliant Violet 421 | 405226      | Biolegend (via Biozol)            | FACS |
| 49 | anti rat-PE (R-Phycoerythrin)     | 712-116-153 | Jackson Immuno Research (Dianova) | FACS |
| 50 | Streptavidin PE-Cy5               | 554062      | BD Pharmingen                     | FACS |
| 51 | anti rabbit APC                   | 711-136-152 | Jackson Immuno Research           | FACS |
| 52 | anti rat Alexa Fluor 488          | A21208      | Invitrogen/ Life Technologies     | IHC  |
| 53 | anti goat Alexa Fluor-488         | A11055      | Invitrogen/ Life Technologies     | IHC  |
| 54 | anti goat Alexa Fluor-546         | A11056      | Invitrogen/ Life Technologies     | IHC  |
